# Supplementary material for: Targeted synthesis and reaction mechanism discussion of Mo2C based insertion-type electrodes for advanced pseudocapacitors
Source: Royal Society of Chemistry journal article supplement (doi:10.1039/d0ta00697a), 2020-01-01
Supplement: d0ta00697a1.pdf [file d0ta00697a1.pdf]

## Supporting Information

### Targeted synthesis and reaction mechanism discussion of Mo<sub>2</sub>C based insertion-type electrodes for advanced pseudocapacitors

Yuanyuan Zhu<sup>†a, e</sup>, Xu Ji<sup>†b</sup>, Lufeng Yang<sup>c</sup>, Jin Jia<sup>d</sup>, Shuang Cheng<sup>a,\*</sup>, Hailong Chen<sup>c</sup>,  
Zhong-Shuai Wu<sup>e</sup>, Donata Passarello<sup>f</sup> and Meilin Liu<sup>g</sup>

<sup>a</sup> New Energy Research Institute, School of Environment and Energy, South China University of Technology, Guangzhou, 510006, People's Republic of China.

<sup>b</sup> College of Automation, Zhongkai University of Agriculture and Engineering, Guangzhou, 510225, People's Republic of China

<sup>c</sup> The Woodruff School of Mechanical Engineering, Georgia Institute of Technology, 771 Ferst Drive, Atlanta, GA 30332-0245, USA.

<sup>d</sup> Institute for Advanced Interdisciplinary Research, Collaborative Innovation Center of Technology and Equipment for Biological Diagnosis and Therapy in Universities of Shandong, University of Jinan, Jinan 250011, People's Republic of China.

<sup>e</sup> Dalian National Laboratory for Clean Energy, Dalian Institute of Chemical Physics, Chinese Academy of Sciences, 457 Zhongshan Road, Dalian 116023, People's Republic of China.

<sup>f</sup> Stanford Synchrotron Radiation Lightsource, SLAC National Accelerator Laboratory, Menlo Park, CA, USA

<sup>g</sup> School of Materials Science and Engineering, Georgia Institute of Technology, Atlanta, GA 30332-0245, USA.

<sup>†</sup> Yuanyuan Zhu and Xu Ji contributed equally to this work.

\* Corresponding author. E-mail address: escheng@scut.edu.cn (S. Cheng).

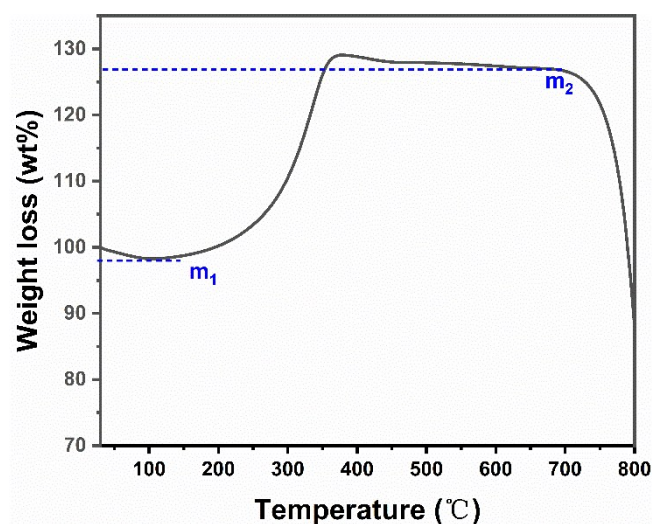

**Fig. S1** TGA curve of the as-prepared N-Mo<sub>2</sub>C/C sample.

To determine the carbon content of the N-Mo<sub>2</sub>C/C composite, thermogravimetric analysis (TGA) was performed in air flow from 30 to 700 °C. Two weight loss districts can be observed in **Fig. S1**, the weight loss (m<sub>1</sub>, 98 wt%) originate from the evaporation of adsorbed water below 200 °C; the following stage (m<sub>2</sub>, 126 wt%) from 300 to 700 °C corresponds to the combustion of surface carbon and the phase transition of MoO<sub>2</sub> to MoO<sub>3</sub>. Thus, the content for Mo<sub>2</sub>C is  $(m_2 - m_1) \times \frac{M(\text{MoO}_3)}{2 \times M(\text{Mo}_2\text{C})} \times 100 \text{ wt\%} = 91 \text{ wt\%}$ . Therefore, the carbon content in the N-Mo<sub>2</sub>C/C composite was 9%.

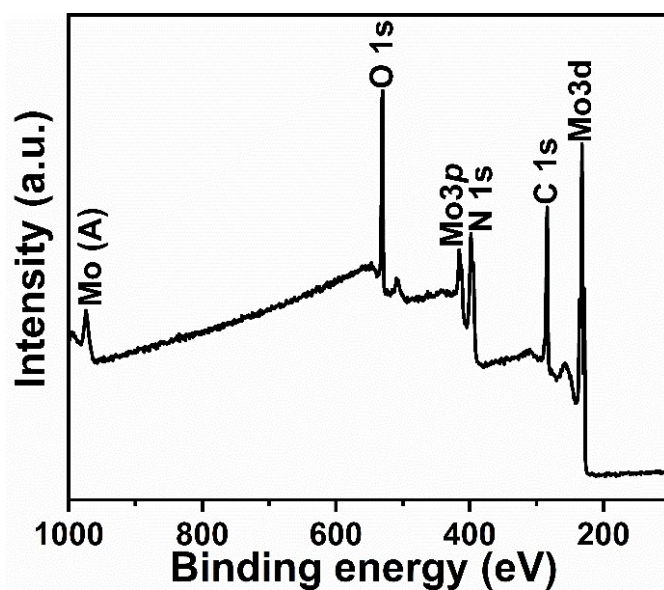

**Fig. S2** XPS survey spectrum of N-Mo<sub>2</sub>C/C sample consists of Mo 3d, C 1s, N 1s, Mo 3p<sub>1/2</sub>, and O 1s species.

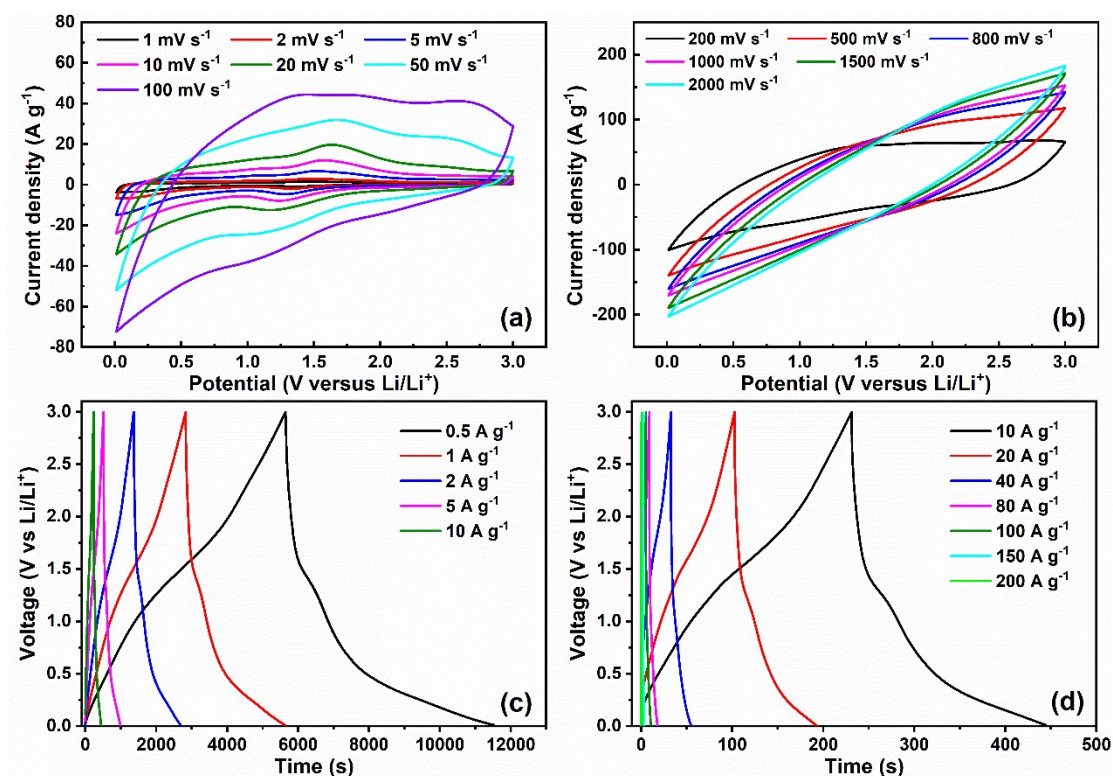

**Fig. S3** CV and GCD curves after long-term cycling: (a) and (b) CV curves at different scan rates from 1 to 2000 mV s<sup>-1</sup>; (c) and (d) GCD curves at different current densities from 0.5 to 200 A g<sup>-1</sup>.

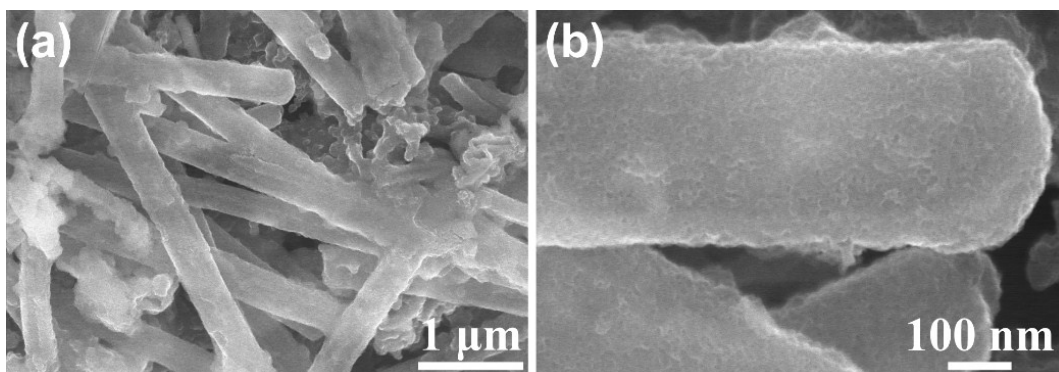

**Fig. S4** (a,b) SEM morphology of N-Mo<sub>2</sub>C/C nanobelts electrodes after long-term cycling.

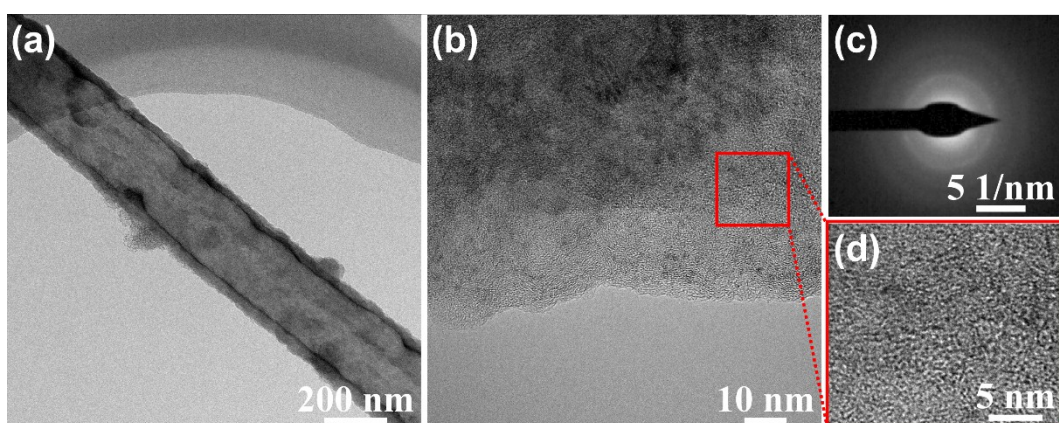

**Fig. S5** (a-d) TEM images of N-Mo<sub>2</sub>C/C nanobelts electrode after long-term cycling.

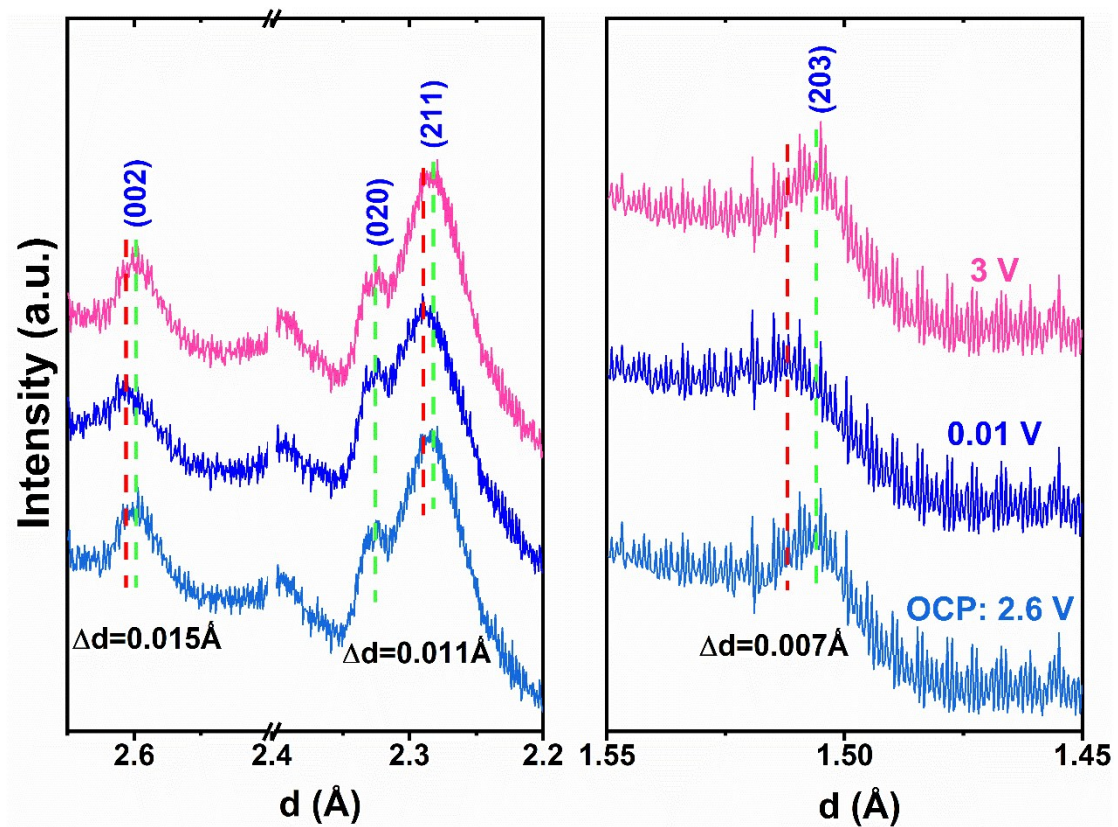

**Fig. S6** *Operando* synchrotron XRD patterns of N-Mo<sub>2</sub>C/C nanobelts electrode under open circuit voltage, full discharge and charge.

**Table S1.** Comparison of the electrochemical performances of N-Mo<sub>2</sub>C/C with previously reported Mo-based electrodes.

| Electrodes                              | Electrolyte                     | Capacitance                                                               | Current Density / Scan rate                                           | Cycling performance | Ref.             |
|-----------------------------------------|---------------------------------|---------------------------------------------------------------------------|-----------------------------------------------------------------------|---------------------|------------------|
| R-MoO <sub>3-x</sub>                    | LiClO <sub>4</sub>              | 550 C g <sup>-1</sup>                                                     | 100 mV s <sup>-1</sup>                                                | 10000<br>(~76%)     | 1                |
| GC/MoO <sub>3-x</sub>                   | Na <sub>2</sub> SO <sub>4</sub> | 307 C g <sup>-1</sup>                                                     | 1 A g <sup>-1</sup>                                                   | -                   | 2                |
| MoO <sub>2</sub> /GO                    | LiClO <sub>4</sub>              | 1097 C g <sup>-1</sup><br>390 C g <sup>-1</sup>                           | 2 mV s <sup>-1</sup><br>1000 mV s <sup>-1</sup>                       | 10000<br>(~80%)     | 3                |
| MoO <sub>2</sub>                        | LiClO <sub>4</sub>              | 70 F g <sup>-1</sup><br>(63 C g <sup>-1</sup> )                           | 4 A g <sup>-1</sup>                                                   | 5000<br>(~72%)      | 4                |
| MoS <sub>2</sub> @BPC                   | NaClO <sub>4</sub>              | 179.8 mAh g <sup>-1</sup><br>(647 C g <sup>-1</sup> )                     | 15 A g <sup>-1</sup>                                                  | 5000<br>(73%)       | 5                |
| Mo <sub>2</sub> C (52.6%)/GR            | LiPF <sub>6</sub>               | 310 mAh g <sup>-1</sup><br>(1116 C g <sup>-1</sup> )                      | 1.6 A g <sup>-1</sup>                                                 | 100<br>(~89%)       | 6                |
| Mo <sub>0.654</sub> C@CNS               | LiPF <sub>6</sub>               | 495 mAh g <sup>-1</sup><br>(1782 C g <sup>-1</sup> )                      | 5 A g <sup>-1</sup>                                                   | 680<br>(<100%)      | 7                |
| Mo <sub>2</sub> C nanosheets            | Na PF <sub>6</sub>              | 85.2 mAh g <sup>-1</sup><br>(306.7 C g <sup>-1</sup> )                    | 2 A g <sup>-1</sup>                                                   | 1200<br>(<100%)     | 8                |
| MnO <sub>2</sub> -Mo <sub>2</sub> C NFs | Na <sub>2</sub> SO <sub>4</sub> | 302 F g <sup>-1</sup><br>(302 C g <sup>-1</sup> )                         | 1 A g <sup>-1</sup>                                                   | 5000<br>(92.6%)     | 9                |
| Mo <sub>2</sub> C/NCF                   | KOH                             | 1250 F g <sup>-1</sup><br>(750 C g <sup>-1</sup> )                        | 1 A g <sup>-1</sup>                                                   | 5000<br>(<100%)     | 10               |
| MoSe <sub>2</sub> -Mo <sub>2</sub> C    | KOH                             | 285 F g <sup>-1</sup><br>(285 C g <sup>-1</sup> )                         | 15 A g <sup>-1</sup>                                                  | 10000<br>(98%)      | 11               |
| N-Mo <sub>2</sub> C/C                   | LiClO <sub>4</sub>              | 1139 C g <sup>-1</sup><br>151 C g <sup>-1</sup><br>1166 C g <sup>-1</sup> | 1 mV s <sup>-1</sup><br>2000mV s <sup>-1</sup><br>1 A g <sup>-1</sup> | 15000<br>(>100%)    | <b>This work</b> |

## References

1. H. S. Kim, J. B. Cook, H. Lin, J. S. Ko, S. H. Tolbert, V. Ozolins and B. Dunn, *Nat. Mater.*, 2017, **16**, 454-460.
2. J. Yang, X. Xiao, P. Chen, K. Zhu, K. Cheng, K. Ye, G. Wang, D. Cao and J. Yan, *Nano Energy*, 2019, **58**, 455-465.
3. Y. Zhu, X. Ji, S. Cheng, Z. Y. Chern, J. Jia, L. Yang, H. Luo, J. Yu, X. Peng, J. Wang, W. Zhou and M. Liu, *ACS Nano*, 2019, **13**, 9091-9099.
4. D. V. Pham, R. A. Patil, C.-C. Yang, W.-C. Yeh, Y. Liou and Y.-R. Ma, *Nano Energy*, 2018, **47**, 105-114.
5. Y. Li, H. Wang, B. Huang, L. Wang, R. Wang, B. He, Y. Gong and X. Hu, *J. Mater. Chem. A*, 2018, **6**, 14742-14751.
6. B. Wang, G. Wang and H. Wang, *J. Mater. Chem. A*, 2015, **3**, 17403-17411.
7. J. Zhu, K. Sakaushi, G. Clavel, M. Shalom, M. Antonietti and T. P. Fellingner, *J. Am. Chem. Soc.*, 2015, **137**, 5480-5485.
8. J. Li, Q.-Q. Yang, Y.-X. Hu, M.-C. Liu, C. Lu, H. Zhang, L.-B. Kong, W.-W. Liu, W.-J. Niu, K. Zhao, Y.-C. Wang, F. Cheng, Z. M. Wang and Y.-L. Chueh, *ACS Sustainable Chem. Eng.*, 2019, **7**, 18375-18383.
9. M. Shi, L. Zhao, X. Song, J. Liu, P. Zhang and L. Gao, *ACS Appl. Mater. Interfaces*, 2016, **8**, 32460-32467.
10. K. J. Samdani, D. W. Joh and K. T. Lee, *J. Alloy. Compo.*, 2018, **748**, 134-144.
11. D. Vikraman, S. Hussain, K. Karuppasamy, A. Feroze, A. Kathalingam, A. Sanmugam, S.-H. Chun, J. Jung and H.-S. Kim, *Appl. Catal. B-Environ.*, 2020, **264**, 118531.
